# Supplementary material for: Protective Effects Induced by a Hydroalcoholic Allium sativum Extract in Isolated Mouse Heart
Source: MDPI journal article supplement (doi:10.3390/nu13072332), 2021-07-08
Supplement: s1 [file s1]

# Protective effects induced by a hydroalcoholic *Allium sativum* extract in isolated mouse heart

Lucia Recinella<sup>1</sup>, Annalisa Chiavaroli<sup>1</sup>, Fabrizio Masciulli<sup>1</sup>, Caterina Frascchetti<sup>2</sup>, Antonello Filippi<sup>2</sup>, Stefania Cesa<sup>2</sup>, Francesco Cairone<sup>2</sup>, Era Gorica<sup>3</sup>, Marinella De Leo<sup>3,4,5</sup>, Alessandra Braca<sup>3,4,5</sup>, Alma Martelli<sup>3,4,6</sup>, Vincenzo Calderone<sup>3,4,6</sup>, Giustino Orlando<sup>1</sup>, Claudio Ferrante<sup>1</sup>, Luigi Menghini<sup>1</sup>, Simonetta Cristina Di Simone<sup>1</sup>, Serena Veschi<sup>1</sup>, Alessandro Cama<sup>1</sup>, Luigi Brunetti<sup>1,\*</sup> and Sheila Leone<sup>1,\*</sup>

- <sup>1</sup> Department of Pharmacy, G. d'Annunzio University of Chieti-Pescara, 66013, Chieti, Italy; lucia.recinella@unich.it (L.R.); annalisa.chiavaroli@unich.it (A.C.); fabriziomasciulli92@gmail.com (F.M.); giustino.orlando@unich.it (G.O.); claudio.ferrante@unich.it (C.F.); luigi.menghini@unich.it (L.M.); disimonesimonetta@gmail.com (S.C.D.S.); veschi@unich.it (S.V.); alessandro.cama@unich.it (A.C.); luigi.brunetti@unich.it (L.B.); sheila.leone@unich.it (S.L.).
- <sup>2</sup> Department of Drug Chemistry and Technology, Sapienza University of Rome, 00185, Rome, Italy; caterina.frascchetti@uniroma1.it (C.F.); antonello.filippi@uniroma1.it (A.F.); stefania.cesa@uniroma1.it (S.C.); francesco.cairone@uniroma1.it (F.C.).
- <sup>3</sup> Department of Pharmacy, University of Pisa, 56126, Pisa, Italy; era.gorica@phd.unipi.it (E.G.); marinella.deleo@unipi.it (M.D.L.); alessandra.braca@unipi.it (A.B.); alma.martelli@unipi.it (A.M.); vincenzo.calderone@unipi.it (V.C.).
- <sup>4</sup> Interdepartmental Research Center "Nutrafood: Nutraceutica e Alimentazione per la Salute", University of Pisa, Italy; marinella.deleo@unipi.it (M.D.L.); alessandra.braca@unipi.it (A.B.); alma.martelli@unipi.it (A.M.); vincenzo.calderone@unipi.it (V.C.).
- <sup>5</sup> CISUP, Centre for Instrumentation Sharing of Pisa University, 56126, Pisa, Italy; marinella.deleo@unipi.it (M.D.L.); alessandra.braca@unipi.it (A.B.).
- <sup>6</sup> Interdepartmental Research Center "Biology and Pathology of Ageing", University of Pisa, Italy; alma.martelli@unipi.it (A.M.); vincenzo.calderone@unipi.it (V.C.).
- \* Correspondence: luigi.brunetti@unich.it; Tel.: +39-0871-3554758; sheila.leone@unich.it; Tel.: +39-0871-3554658.

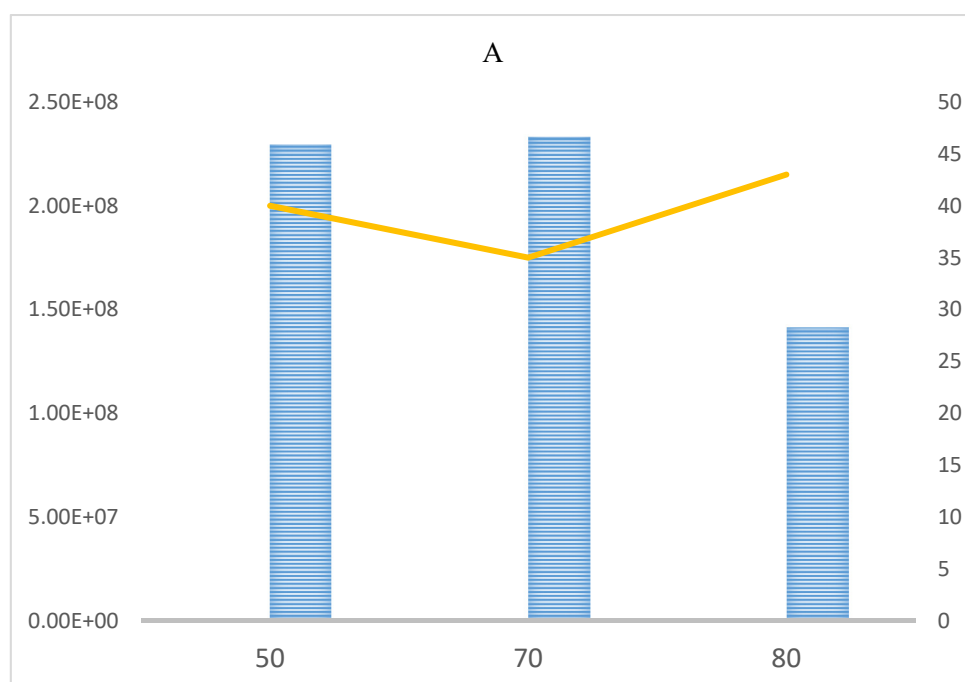

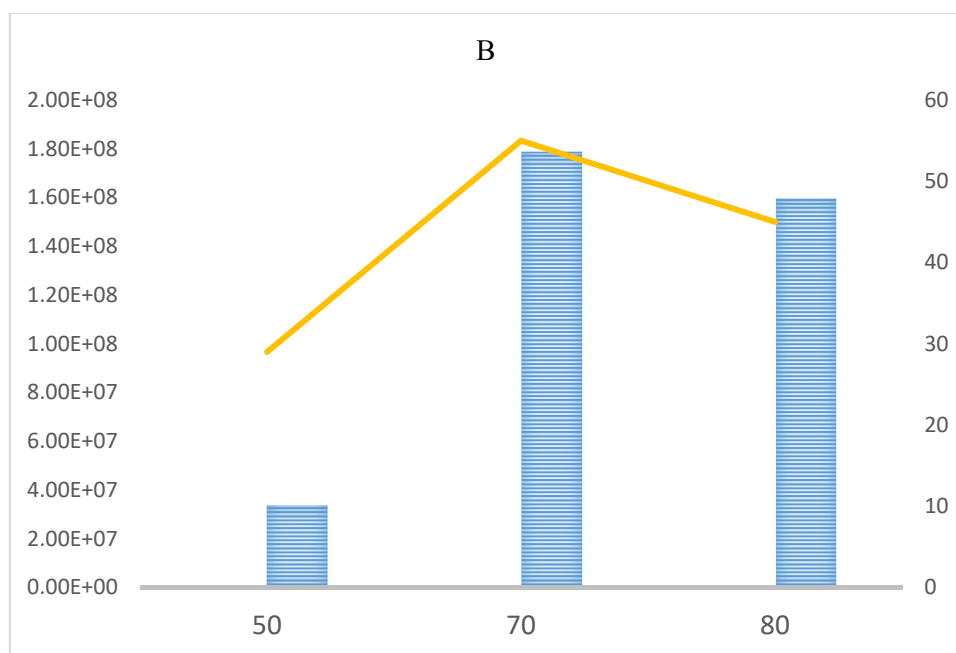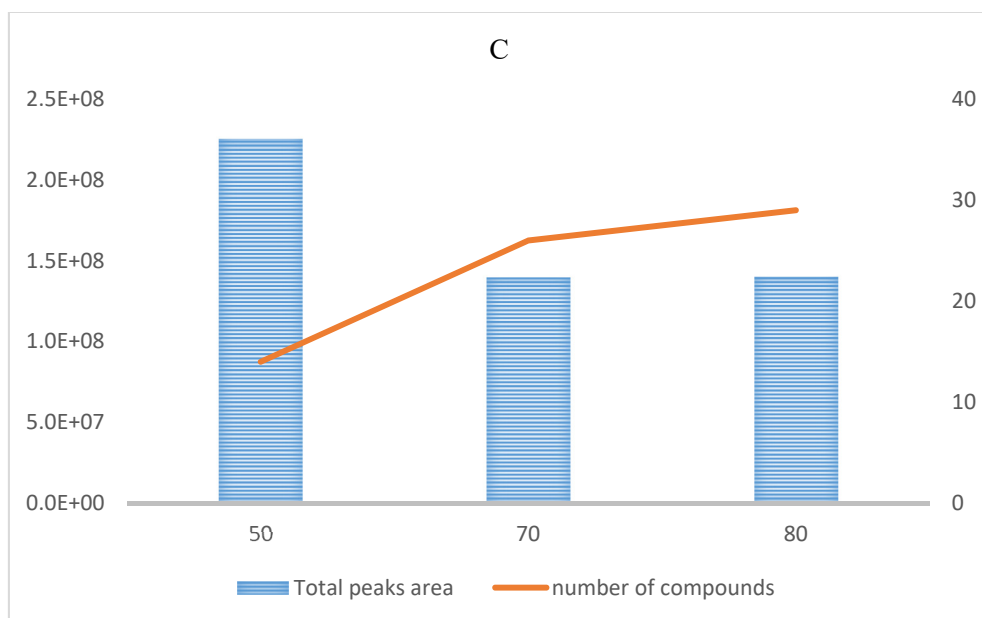

**Figure S1.** Optimization of HS-SPME conditions using A) DVB-CAR-PDMS, B) PDMS-DVB, C) CAR-PDMS fibers with the following settings:  $t_{eq}$  = 20 min,  $t_{sa}$  = 35 min. Total peaks area (primary axes) and number of detected peaks (secondary axes) vs equilibration/sampling temperature (in °C).

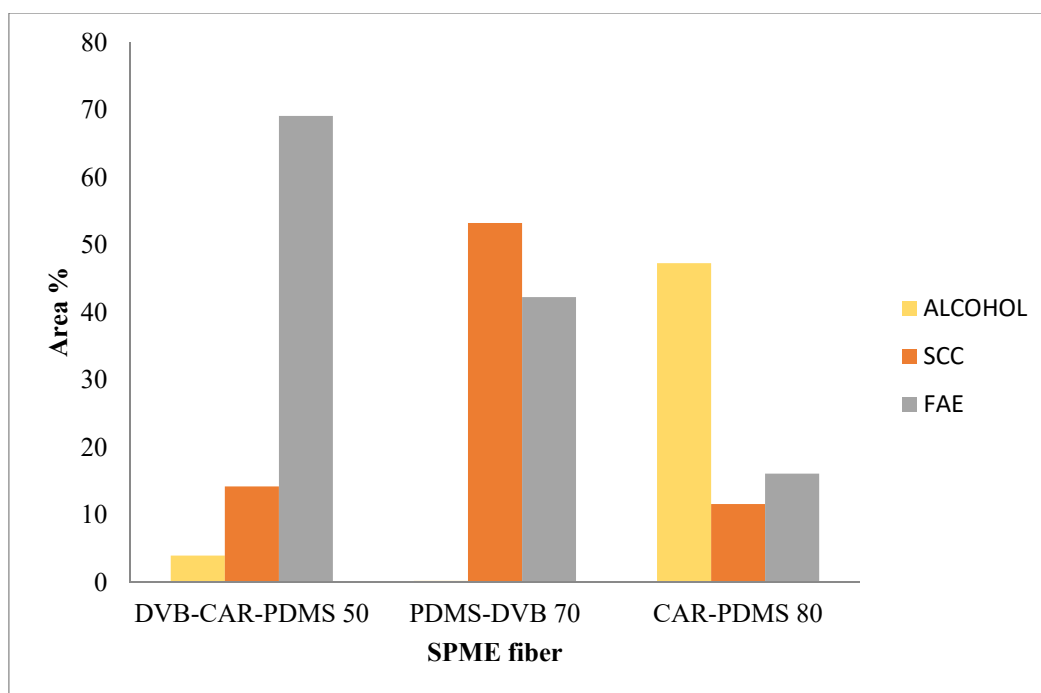

**Figure S2.** Distribution of the principal classes of volatile compounds detected. The following HS-SPME conditions have been used:  $t_{eq}$  = 20 min,  $t_{sa}$  = 35 min. The HS-SPME temperatures are reported into the brackets for each employed fiber.

**Table S1.** HS-SPME-GC-MS results obtained using PDMS-DVB fiber ( $t_{eq} = 20$  min and  $t_{sa} = 15$  min at  $T = 80$  °C).

| Compound                                        | Class   | Area% | RI   | RI <sup>a</sup> |
|-------------------------------------------------|---------|-------|------|-----------------|
| Propene <sup>b</sup>                            | Other   | 0,33  | -    | -               |
| Allyl alcohol <sup>b</sup>                      | Alcohol | 0,27  | -    | -               |
| Trichloromethane <sup>b</sup>                   | Other   | 0,34  | -    | -               |
| 1,3 Propanedithiol                              | SCC     | 0,17  | 844  | 861             |
| Diallyl sulfide                                 | SCC     | 0,06  | 861  | 857             |
| Methyl allyl disulfide                          | SCC     | 0,06  | 920  | 919             |
| 2,2,4,6,6-Pentamethyl heptane                   | Other   | 0,03  | 989  | 995             |
| Diallyl disulphide                              | SCC     | 12,50 | 1083 | 1090            |
| Allyl propyl disulfide                          | SCC     | 0,49  | 1097 | 1097            |
| Ligustrazin                                     | Other   | 0,26  | 1100 | 1083            |
| Allyl methyl trisulfide                         | SCC     | 0,91  | 1142 | 1137            |
| 2,3,5-Trimethyl-6-ethyl pyrazine                | Other   | 0,46  | 1172 | 1163            |
| 3-Vinyl 1,2 dithiacyclohex-5-ene                | SCC     | 0,29  | 1192 | 1214            |
| 3-Vinyl 1,2 dithiacyclohex-4-ene                | SCC     | 0,82  | 1219 | 1185            |
| Diallyl trisulfide (allitridin)                 | SCC     | 37,52 | 1307 | 1300            |
| Propenil propyl trisulfide                      | SCC     | 0,50  | 1319 | 1314            |
| Eugenol                                         | Alcohol | 1,48  | 1368 | 1357            |
| Allyl-1-methylthio propyl disulfide             | SCC     | 0,25  | 1388 | 1387            |
| Cyclopentane nonyl                              | Other   | 0,22  | 1450 | 1451            |
| Diallyl tetrasulfide                            | SCC     | 3,23  | 1550 | 1539            |
| 2,4-Dimethyl-5,6-dithia-2,7-nonadienal          | SCC     | 3,57  | 1776 | 1788            |
| 2,4-Dimethyl-5,6-dithia-2,7-nonadienal (isomer) | SCC     | 1,09  | 1792 | 1788            |
| Myristic acid                                   | Other   | 0,24  | 1798 | 1794            |
| FAE (unidentified)                              | FAE     | 0,40  | 1827 | -               |
| Methyl hexadecanoate                            | FAE     | 0,82  | 1929 | 1925            |
| Dibutyl phtalate                                | Other   | 0,22  | 1973 | 1960            |
| Ethyl palmitoleate                              | FAE     | 0,33  | 1976 | 1975            |
| Ethyl palmitate                                 | FAE     | 6,88  | 1998 | 1993            |
| Allyl stearate <sup>b</sup>                     | FAE     | 0,12  | 2093 | -               |
| Methyl linoleate                                | FAE     | 0,71  | 2100 | 2093            |
| Methyl elaidate                                 | FAE     | 0,15  | 2105 | 2107            |
| Ethyl linoleate                                 | FAE     | 8,70  | 2163 | 2164            |
| Ethyl oleate                                    | FAE     | 1,52  | 2168 | 2173            |
| Ethyl linolenate                                | FAE     | 0,51  | 2171 | 2153            |
| Methyl-9,12-heptadecadienoate <sup>b</sup>      | FAE     | 0,99  | 2245 | -               |
| 1-Hexyl-2-nitro cyclohexane <sup>b</sup>        | Other   | 0,25  | 2250 | -               |
| 13 unknown                                      |         | 13.31 |      |                 |
| Class                                           | Area%   |       |      |                 |
| Alcohol                                         | 1.75    |       |      |                 |
| SCC                                             | 61.46   |       |      |                 |
| FAE                                             | 21.13   |       |      |                 |
| Others                                          | 2.35    |       |      |                 |

<sup>a</sup>RI reported in literature <sup>b</sup>MS-only identification method.

**Table S2.** HS-SPME-GC-MS results obtained using CAR-PDMS fiber ( $t_{eq}$  = 20 min and  $t_{sa}$  = 15 min at  $T$  = 80 °C).

| Compound                                        | Class        | Area% | RI   | RI <sub>L</sub> <sup>a</sup> |
|-------------------------------------------------|--------------|-------|------|------------------------------|
| Allyl alcohol <sup>b</sup>                      | Alcohol      | 31.04 | -    | -                            |
| Acetic acid <sup>b</sup>                        | Other        | 8.38  | -    | -                            |
| Trichloromethane <sup>b</sup>                   | Other        | 3.80  | -    | -                            |
| 2,3-Butanediol                                  | Alcohol      | 28.06 | 800  | 788                          |
| Diallyl disulphide <sup>b</sup>                 | SCC          | 5.60  | 1084 | -                            |
| Diallyl trisulfide (allitridin)                 | SCC          | 2.99  | 1308 | 1300                         |
| 2,4 Dimethyl 5,6 dithia 2,7 nonadienal          | SCC          | 2.03  | 1779 | 1788                         |
| 2,4 Dimethyl 5,6 dithia 2,7 nonadienal (isomer) | SCC          | 0.92  | 1795 | 1788                         |
| Ethyl palmitate                                 | FAE          | 7.41  | 2000 | 1993                         |
| Ethyl linoleate                                 | FAE          | 4.88  | 2166 | 2164                         |
| Ethyl oleate                                    | FAE          | 1.71  | 2171 | 2173                         |
| 3 unknown                                       |              | 3.18  |      |                              |
| <b>Class</b>                                    | <b>Area%</b> |       |      |                              |
| Alcohol                                         | 59.10        |       |      |                              |
| SCC                                             | 11.54        |       |      |                              |
| FAE                                             | 14.0         |       |      |                              |
| Others                                          | 12.18        |       |      |                              |

<sup>a</sup>RI reported in literature <sup>b</sup>MS-only identification method.
